# Supplementary material
Source: PubMed Central journal article supplement (PMC3421697)
Supplement: JVI.00696-12_zjv999096272so1.pdf [file JVI.00696-12_zjv999096272so1.pdf]

Table S1. Neutralization IC80 values (µg/ml) for twenty-one PG9 resistant HIV-1 Env-pseudoviruses and their corresponding gain of function mutants

| Clade | Virus             |                             | V1/V2 mAbs       |              |              |              |                          |              | Control mAbs <sup>a</sup> |             |              |              |              |
|-------|-------------------|-----------------------------|------------------|--------------|--------------|--------------|--------------------------|--------------|---------------------------|-------------|--------------|--------------|--------------|
|       | Short name        | Full name                   | PG9              | PG16         | CH01         | CH04         | PGT141                   | PGT145       | VRC01                     | F105        | 17b          | PGT128       | 4E10         |
| C     | 3873              | 3873.V1.C24                 | >50 <sup>b</sup> | >50          | >50          | >50          | <b>0.287<sup>c</sup></b> | <b>0.042</b> | <b>5.72</b>               | >50         | >50          | <b>0.016</b> | >50          |
|       | 3873-E171K        | 3873.V1.C24-E171K           | <b>0.072</b>     | <b>0.011</b> | <b>12.9</b>  | <b>12.0</b>  | <b>0.197</b>             | <b>0.04</b>  | <b>4.19</b>               | >50         | >50          | <b>0.015</b> | <b>29.1</b>  |
| C     | 6631              | 6631.V3.C10                 | >50              | >50          | >50          | >50          | >50                      | >50          | >50                       | >50         | >50          | >50          | >50          |
|       | 6631-E169K        | 6631.V3.C10-E169K           | <b>1.42</b>      | <b>0.44</b>  | <b>12.5</b>  | <b>7.52</b>  | >50                      | >50          | >50                       | >50         | >50          | >50          | >50          |
| B     | BG1168            | BG1168.01                   | >50              | >50          | >50          | >50          | >50                      | >50          | <b>0.981</b>              | >50         | >50          | >50          | <b>9.41</b>  |
|       | BG1168-ins171K    | BG1168.01-ins171K           | >50              | >50          | >50          | >50          | >50                      | <b>2.16</b>  | <b>4.00</b>               | >50         | >50          | >50          | <b>14.2</b>  |
| B     | JRFL              | JRFL.JB                     | >50              | >50          | >50          | >50          | >50                      | >50          | <b>0.092</b>              | >50         | >50          | <b>0.024</b> | <b>17.9</b>  |
|       | JRFL-E168K        | JRFL.JB-E168K               | <b>0.051</b>     | <b>0.023</b> | >50          | >50          | >50                      | <b>0.064</b> | <b>0.067</b>              | >50         | >50          | <b>0.016</b> | <b>11.2</b>  |
| AG    | T251              | T251-18                     | >50              | >50          | >50          | >50          | >50                      | <b>1.73</b>  | <b>8.88</b>               | >50         | >50          | >50          | >50          |
|       | T251-T169K        | T251-18-T169K               | <b>0.32</b>      | <b>0.08</b>  | >50          | >50          | >50                      | <b>0.489</b> | <b>9.53</b>               | >50         | >50          | >50          | <b>40</b>    |
|       | T251-C            | T251-18-CAP45strandC        | <b>1.81</b>      | <b>3.31</b>  | >50          | >50          | <b>0.035</b>             | <b>0.226</b> | <b>10.5</b>               | >50         | >50          | >50          | >50          |
| C     | 6471              | 6471.V1.C16                 | >50              | >50          | >50          | >50          | >50                      | >50          | >50                       | >50         | >50          | >50          | >50          |
|       | 6471-E169K/E171K  | 6471.V1.C16-E169K.E171K     | <b>0.195</b>     | <b>0.063</b> | <b>9.75</b>  | <b>7.02</b>  | <b>0.384</b>             | <b>1.81</b>  | >50                       | >50         | >50          | >50          | >50          |
| B     | CNE4              | CNE4                        | >50              | >50          | >50          | >50          | >50                      | >50          | <b>1.85</b>               | >50         | >50          | <b>11.6</b>  | <b>8.00</b>  |
|       | CNE4-N128T/T130D  | CNE4-N128T.T130D            | >50              | >50          | >50          | >50          | >50                      | >50          | <b>0.941</b>              | <b>4.72</b> | <b>46.1</b>  | >50          | <b>1.46</b>  |
|       | CNE4-ins171K      | CNE4-ins171K                | <b>4.21</b>      | >50          | >50          | >50          | >50                      | >50          | <b>1.01</b>               | <b>1.48</b> | <b>1.19</b>  | >50          | <b>0.539</b> |
|       | CNE4-C            | CNE4-CAP45strandC           | <b>0.398</b>     | >50          | >50          | >50          | >50                      | >50          | <b>1.56</b>               | <b>2.56</b> | <b>0.694</b> | >50          | <b>0.677</b> |
| C     | CNE30             | CNE30                       | >50              | >50          | >50          | >50          | >50                      | >50          | <b>3.59</b>               | >50         | >50          | <b>1.43</b>  | >50          |
|       | CNE30-F164E       | CNE30-F164E                 | >50              | >50          | >50          | >50          | >50                      | >50          | <b>3.45</b>               | >50         | >50          | <b>2.18</b>  | >50          |
|       | CNE30-F164E/H169K | CNE30-F164E.H169K           | <b>12.3</b>      | <b>4.9</b>   | >50          | >50          | >50                      | >50          | <b>2.38</b>               | >50         | >50          | <b>1.02</b>  | >50          |
| B     | 7165              | 7165.18                     | >50              | >50          | >50          | >50          | >50                      | <b>0.301</b> | >50                       | >50         | >50          | <b>0.01</b>  | >50          |
|       | 7165-E173Y        | 7165.18-E173Y               | <b>38.2</b>      | <b>1.34</b>  | >50          | >50          | <b>2.01</b>              | <b>0.121</b> | >50                       | >50         | >50          | <b>0.009</b> | <b>14.9</b>  |
|       | 7165-C            | 7165.18-CAP45strandC        | <b>0.107</b>     | <b>0.049</b> | >50          | >50          | >50                      | <b>0.195</b> | >50                       | >50         | >50          | <b>0.008</b> | <b>7.68</b>  |
| A     | 398               | 398-F1_F6_20                | >50              | >50          | <b>3.82</b>  | <b>6.24</b>  | >50                      | >50          | <b>0.488</b>              | >50         | >50          | <b>0.004</b> | <b>44.3</b>  |
|       | 398-C             | 398-F1_F6_20-CAP45strandC   | <b>0.017</b>     | <b>0.012</b> | <b>0.468</b> | <b>0.987</b> | <b>4.34</b>              | <b>26.3</b>  | <b>0.425</b>              | >50         | >50          | <b>0.006</b> | <b>15.5</b>  |
| C     | 6322              | 6322.V4.C1                  | >50              | >50          | >50          | >50          | <b>0.064</b>             | <b>1.46</b>  | >50                       | >50         | >50          | >50          | <b>45.6</b>  |
|       | 6322-C            | 6322.V4.C1-CAP45strandC     | <b>0.061</b>     | <b>0.021</b> | >50          | >50          | <b>&lt;0.003</b>         | <b>0.006</b> | >50                       | >50         | >50          | >50          | <b>40.4</b>  |
| D     | 6405              | 6405.v4.c34                 | >50              | >50          | >50          | >50          | >50                      | >50          | <b>4.60</b>               | >50         | >50          | <b>14.3</b>  | <b>38.9</b>  |
|       | 6405-N166R        | 6405.v4.c34-N166R           | >50              | >50          | >50          | >50          | <b>24.5</b>              | >50          | <b>5.36</b>               | >50         | >50          | <b>13.2</b>  | <b>24.1</b>  |
|       | 6405-C            | 6405.v4.c34-CAP45strandC    | <b>2.52</b>      | >50          | >50          | >50          | <b>0.015</b>             | <b>10.8</b>  | <b>4.07</b>               | >50         | >50          | <b>21.0</b>  | <b>14.8</b>  |
| AE    | CNE56             | CNE56                       | >50              | >50          | >50          | >50          | >50                      | <b>11.7</b>  | <b>1.21</b>               | >50         | >50          | >50          | <b>8.19</b>  |
|       | CNE56-C           | CNE56-CAP45strandC          | <b>1.05</b>      | <b>0.227</b> | >50          | >50          | <b>0.569</b>             | <b>8.61</b>  | <b>1.32</b>               | >50         | >50          | >50          | <b>1.42</b>  |
| A     | 0439              | 0439.v5.c1                  | >50              | >50          | >50          | >50          | <b>28.3</b>              | <b>19.4</b>  | <b>0.508</b>              | >50         | >50          | <b>16.7</b>  | <b>36.5</b>  |
|       | 0439-C            | 0439.v5.c1-CAP45strandC     | >50              | >50          | >50          | >50          | >50                      | >50          | <b>0.422</b>              | >50         | >50          | <b>11.4</b>  | <b>11.5</b>  |
| D     | A03349M1          | A03349M1.vrc4a              | >50              | >50          | >50          | >50          | >50                      | >50          | <b>20.7</b>               | >50         | >50          | <b>0.041</b> | <b>14.4</b>  |
|       | A03349M1-C        | A03349M1.vrc4a-CAP45strandC | >50              | >50          | >50          | >50          | >50                      | <b>0.630</b> | <b>3.84</b>               | >50         | >50          | >50          | <b>6.54</b>  |
| B     | QH0515            | QH0515.01                   | >50              | >50          | >50          | >50          | >50                      | >50          | <b>1.41</b>               | >50         | >50          | >50          | <b>13</b>    |
|       | QH0515-ins171K    | QH0515.01-ins171K           | >50              | >50          | >50          | >50          | >50                      | >50          | <b>5.19</b>               | >50         | >50          | >50          | <b>22.7</b>  |
|       | QH0515-C          | QH0515.01-CAP45strandC      | >50              | >50          | >50          | >50          | >50                      | >50          | <b>9.33</b>               | >50         | >50          | >50          | <b>12.7</b>  |
| A     | QH209             | QH209.14M.a2                | >50              | >50          | >50          | >50          | >50                      | <b>0.143</b> | <b>0.067</b>              | >50         | >50          | >50          | <b>14.9</b>  |
|       | QH209-C           | QH209.14M.a2-CAP45strandC   | >50              | >50          | >50          | >50          | >50                      | >50          | <b>0.1</b>                | >50         | >50          | >50          | <b>20.1</b>  |
| B     | RHPA              | RHPA.7                      | >50              | >50          | >50          | >50          | <b>0.458</b>             | <b>0.189</b> | <b>0.164</b>              | >50         | >50          | <b>0.027</b> | >50          |
|       | RHPA-C            | RHPA.7-CAP45strandC         | <b>5.93</b>      | <b>0.918</b> | >50          | >50          | >50                      | >50          | <b>0.158</b>              | >50         | >50          | <b>0.03</b>  | <b>43.3</b>  |
| G     | X2088             | X2088                       | >50              | >50          | >50          | >50          | >50                      | >50          | >50                       | >50         | >50          | >50          | >50          |
|       | X2088-C           | X2088-CAP45strandC          | >50              | >50          | >50          | >50          | >50                      | >50          | >50                       | >50         | >50          | >50          | >50          |
| C     | ZM135             | ZM135.10a                   | >50              | >50          | >50          | >50          | >50                      | >50          | <b>2.24</b>               | >50         | >50          | <b>20.4</b>  | <b>1.00</b>  |
|       | ZM135-C           | ZM135.10a-CAP45strandC      | <b>0.372</b>     | <b>0.389</b> | >50          | >50          | <b>0.043</b>             | <b>8.4</b>   | <b>6.3</b>                | >50         | >50          | >50          | <b>7.33</b>  |
| C     | ZM651             | ZM651.02                    | >50              | >50          | >50          | >50          | >50                      | >50          | <b>4.32</b>               | >50         | >50          | >50          | <b>3.23</b>  |
|       | ZM651-C           | ZM651.02-CAP45strandC       | >50              | >50          | >50          | >50          | >50                      | >50          | <b>5.4</b>                | >50         | >50          | >50          | <b>8.4</b>   |

<sup>a</sup> Control mAb epitopes: VRC01 and F105, CD4 binding site; 17b, CD4-induced; PGT128, glycan/loop; 4E10, membrane-proximal region<sup>b</sup> >50, no neutralization at 50 µg/ml<sup>c</sup> bolded values are IC80 in µg/ml
